# Supplementary material for: Rollover Stability of Heavy-Duty AGVs in Turns Considering Variation in Friction Coefficient
Source: MDPI journal article supplement (doi:10.3390/lubricants11030119), 2023-03-08
Supplement: s1 [file s1]

**Table S1. Orthogonal test results table**

| Tests                 | Factors                                                                             |                                       |                                  | Test results |
|-----------------------|-------------------------------------------------------------------------------------|---------------------------------------|----------------------------------|--------------|
|                       | turning rate $v$ ( $^{\circ}/s$ )                                                   | the centre of mass<br>height $h$ (mm) | road adhesion<br>coefficient $f$ | $LTR_{max}$  |
| 1                     | 1                                                                                   | 1                                     | 1                                | 0.23         |
| 2                     | 1                                                                                   | 2                                     | 2                                | 0.24         |
| 3                     | 1                                                                                   | 3                                     | 3                                | 0.24         |
| 4                     | 1                                                                                   | 4                                     | 4                                | 0.27         |
| 5                     | 2                                                                                   | 1                                     | 2                                | 0.35         |
| 6                     | 2                                                                                   | 2                                     | 1                                | 0.35         |
| 7                     | 2                                                                                   | 3                                     | 4                                | 0.36         |
| 8                     | 2                                                                                   | 4                                     | 3                                | 0.34         |
| 9                     | 3                                                                                   | 1                                     | 3                                | 0.37         |
| 10                    | 3                                                                                   | 2                                     | 4                                | 0.43         |
| 11                    | 3                                                                                   | 3                                     | 1                                | 0.37         |
| 12                    | 3                                                                                   | 4                                     | 2                                | 0.43         |
| 13                    | 4                                                                                   | 1                                     | 4                                | 0.4          |
| 14                    | 4                                                                                   | 2                                     | 3                                | 0.41         |
| 15                    | 4                                                                                   | 3                                     | 2                                | 0.47         |
| 16                    | 4                                                                                   | 4                                     | 1                                | 0.5          |
| $\bar{k}_1$           | 0.245                                                                               | 0.323                                 | 0.378                            |              |
| $\bar{k}_2$           | 0.345                                                                               | 0.342                                 | 0.367                            |              |
| $\bar{k}_3$           | 0.395                                                                               | 0.372                                 | 0.337                            |              |
| $\bar{k}_4$           | 0.445                                                                               | 0.393                                 | 0.348                            |              |
| Range                 | 0.200                                                                               | 0.070                                 | 0.041                            |              |
| Secondary factors     | Turning rate > the centre of mass height > road adhesion coefficient                |                                       |                                  |              |
| optimal<br>alterative | Turning rate 50°/s; the centre of mass height 1200mm; road adhesion coefficient 0.6 |                                       |                                  |              |
